# Supplementary material
Source: ML conference proceedings conference paper supplement (https://proceedings.neurips.cc/paper_files/paper/2020/hash/3465ab6e0c21086020e382f09a482ced-Abstract.html)
Supplement: Supplementary file [file 3465ab6e0c21086020e382f09a482ced-Supplemental.zip]

## A Architectural and Training Details

We initialized the Lagrange multiplier of regret ( $\lambda_i$ ) as 5, and update it every 6 batches, and we experiment with values for the constant  $\rho^{\text{rgt}}$  ranging between 0.5 to 2 (reporting the choice that gave the lowest regret). For the IR violation penalty, we initialize the Lagrange multiplier of IR violation ( $\mu_i$ ) as 20, and update the Lagrange multiplier every 6 iterations.  $\mu$  is initialized as 5, and then incremented by 5 every 5 batches. For distillation, we take a mean squared error loss between the student and teacher’s output, and use a multiplier of  $\frac{1}{400}$ . Specifically, the Lagrange multipliers are updated as follows.

$$\begin{aligned}\lambda_{i+1} &= \lambda_i + \rho^{\text{rgt}} \widehat{\text{rgt}}_i & \rho_{i+1}^{\text{rgt}} &= \rho_i^{\text{rgt}} + \rho_{inc}^{\text{rgt}} \\ \mu_{i+1} &= \mu_i + \rho^{\text{irv}} \text{irv}_i & \rho_{i+1}^{\text{irv}} &= \rho_i^{\text{irv}} + \rho_{inc}^{\text{irv}}\end{aligned}$$

| Auction Setting    | Inner Product | Relu Stability Regularizer | Embedding Layer            |
|--------------------|---------------|----------------------------|----------------------------|
| 1 Agent x 2 Items  | Yes           | No                         | 1 hidden layer x 128 units |
| 1 Agent x 2 Items  | Yes           | Yes                        | 1 hidden layer x 128 units |
| 1 Agent x 2 Items  | No            | Yes                        | 1 hidden layer x 128 units |
| 2 Agents x 2 Items | Yes           | No                         | 2 hidden layer x 128 units |
| 2 Agents x 2 Items | Yes           | Yes                        | 2 hidden layer x 128 units |
| 2 Agents x 2 Items | No            | Yes                        | 2 hidden layer x 128 units |

## B Additional Experimental Information

**Hardware** All certification experiments were conducted on an AMD Ryzen 3600X CPU with 32GB RAM. Training of the network was conducted with a 2080 GPU on a university compute cluster.

**Additional experiments** Table 4 shows more detailed results for the non-IR-enforcing architecture. IR violations are relatively small, and filtering out these cases (sacrificing revenue) does not harm overall revenue too much.

Table 3 shows the results of scaling experiments for settings with more agents and items, in a setting where payment clipping is applied. Again, increasing the dimensionality of the input space by increasing the number of items seems to impose a greater cost than increasing the number of agents.

| Auction setting | Mean solve time (s) | Regret        |
|-----------------|---------------------|---------------|
| 2x3             | 109.749 (159.212)   | 0.027 (0.016) |
| 3x2             | 3.033 (2.377)       | 0.019 (0.016) |
| 3x3             | 59.173 (53.431)     | 0.022 (0.020) |

Table 3: Solve times and regrets for non-IR architecture with clipped payments in larger settings on 250 random points. In general, increasing the number of items significantly slows down certification. Standard deviations are in parentheses.

---

| <b>Auction<br/>Setting</b> | <b>% of<br/>IR violation</b> | <b>Max<br/>IR violation</b> | <b>Mean<br/>IR violation</b> | <b>Revenue before<br/>enforcing IR</b> | <b>Revenue after<br/>enforcing IR</b> |
|----------------------------|------------------------------|-----------------------------|------------------------------|----------------------------------------|---------------------------------------|
| 1x2                        | 5.53%                        | 0.0053                      | 0.0001 (0.0003)              | 0.5738                                 | 0.5681                                |
| 2x2                        | 4.60%                        | 0.0083                      | 0.0002 (0.0007)              | 0.8874                                 | 0.8824                                |

---

Table 4: IR violation for the 1x2/2x2 auction settings. Note that the mean IR violation is small, and revenue after enforcing IR drops only slightly. The number in parenthesis represents the standard deviation.
